# Supplementary material for: An ordered assembly of MYH glycosylase, SIRT6 protein deacetylase, and Rad9-Rad1-Hus1 checkpoint clamp at oxidatively damaged telomeres
Source: publisher site journal article supplement (doi:10.18632/aging.103934), 2020-09-29
Supplement: Supplementary file [file aging-v12i18-103934-supplementary-material-SD3.pdf]

## SUPPLEMENTARY TABLE

Supplementary Table 1. Primers used for mutagenesis, subcloning, PCR analyses, and DNA sequencing.

| Name                             | Sequence                                                       |
|----------------------------------|----------------------------------------------------------------|
| hMYH <sup>V315A</sup> Sense      | AGCACACTCCTCCGCGTCAGGACTGCC                                    |
| hMYH <sup>V315A</sup> Anti-sense | GGCAGTCCTGACGCGGAGGAGTGTGCT                                    |
| hMYH <sup>Q324H</sup> Sense      | GTGCTCCCAACTGGACATTGCCACCTGT                                   |
| hMYH <sup>Q324H</sup> Anti-sense | ACAGGTGGCAATGTCCAGTGTGGGAGCAC                                  |
| pEGFP-C1 hHus1 Forward           | TCT GCA GTC GAC ATG AAG TTT CGG GCC AAG                        |
| pEGFP-C1 hHus1 Reverse           | CC GGT GGA TCC CTA GGA CAG CGC AGG GAT GAA                     |
| Chang 594                        | AGC CGG AAG AGG TGG TAT TG                                     |
| Chang 638                        | CCG GCC ACG AGA ATA GTA GC                                     |
| Chang 639                        | TTGCATTGACAGGCAGAAGA                                           |
| Chang 640                        | TCACCCGTCAGTCCCTCTAT                                           |
| IDC-F                            | AGATCTCGAGATGCGCCAGAGAGTGGAGCAGGAACAG                          |
| IDC-R                            | CTGCAGAATTCGATCTAGCTTAACTCTCTTAGCAGCTGGGGGGGCTTGCG<br>GCTGGCCT |
